# Supplementary figures and images for: High-performance three-dimensional nanoporous NiO film as a supercapacitor electrode
Source: Royal Society of Chemistry journal article supplement (doi:10.1039/c2jm31526b), 2012-01-01

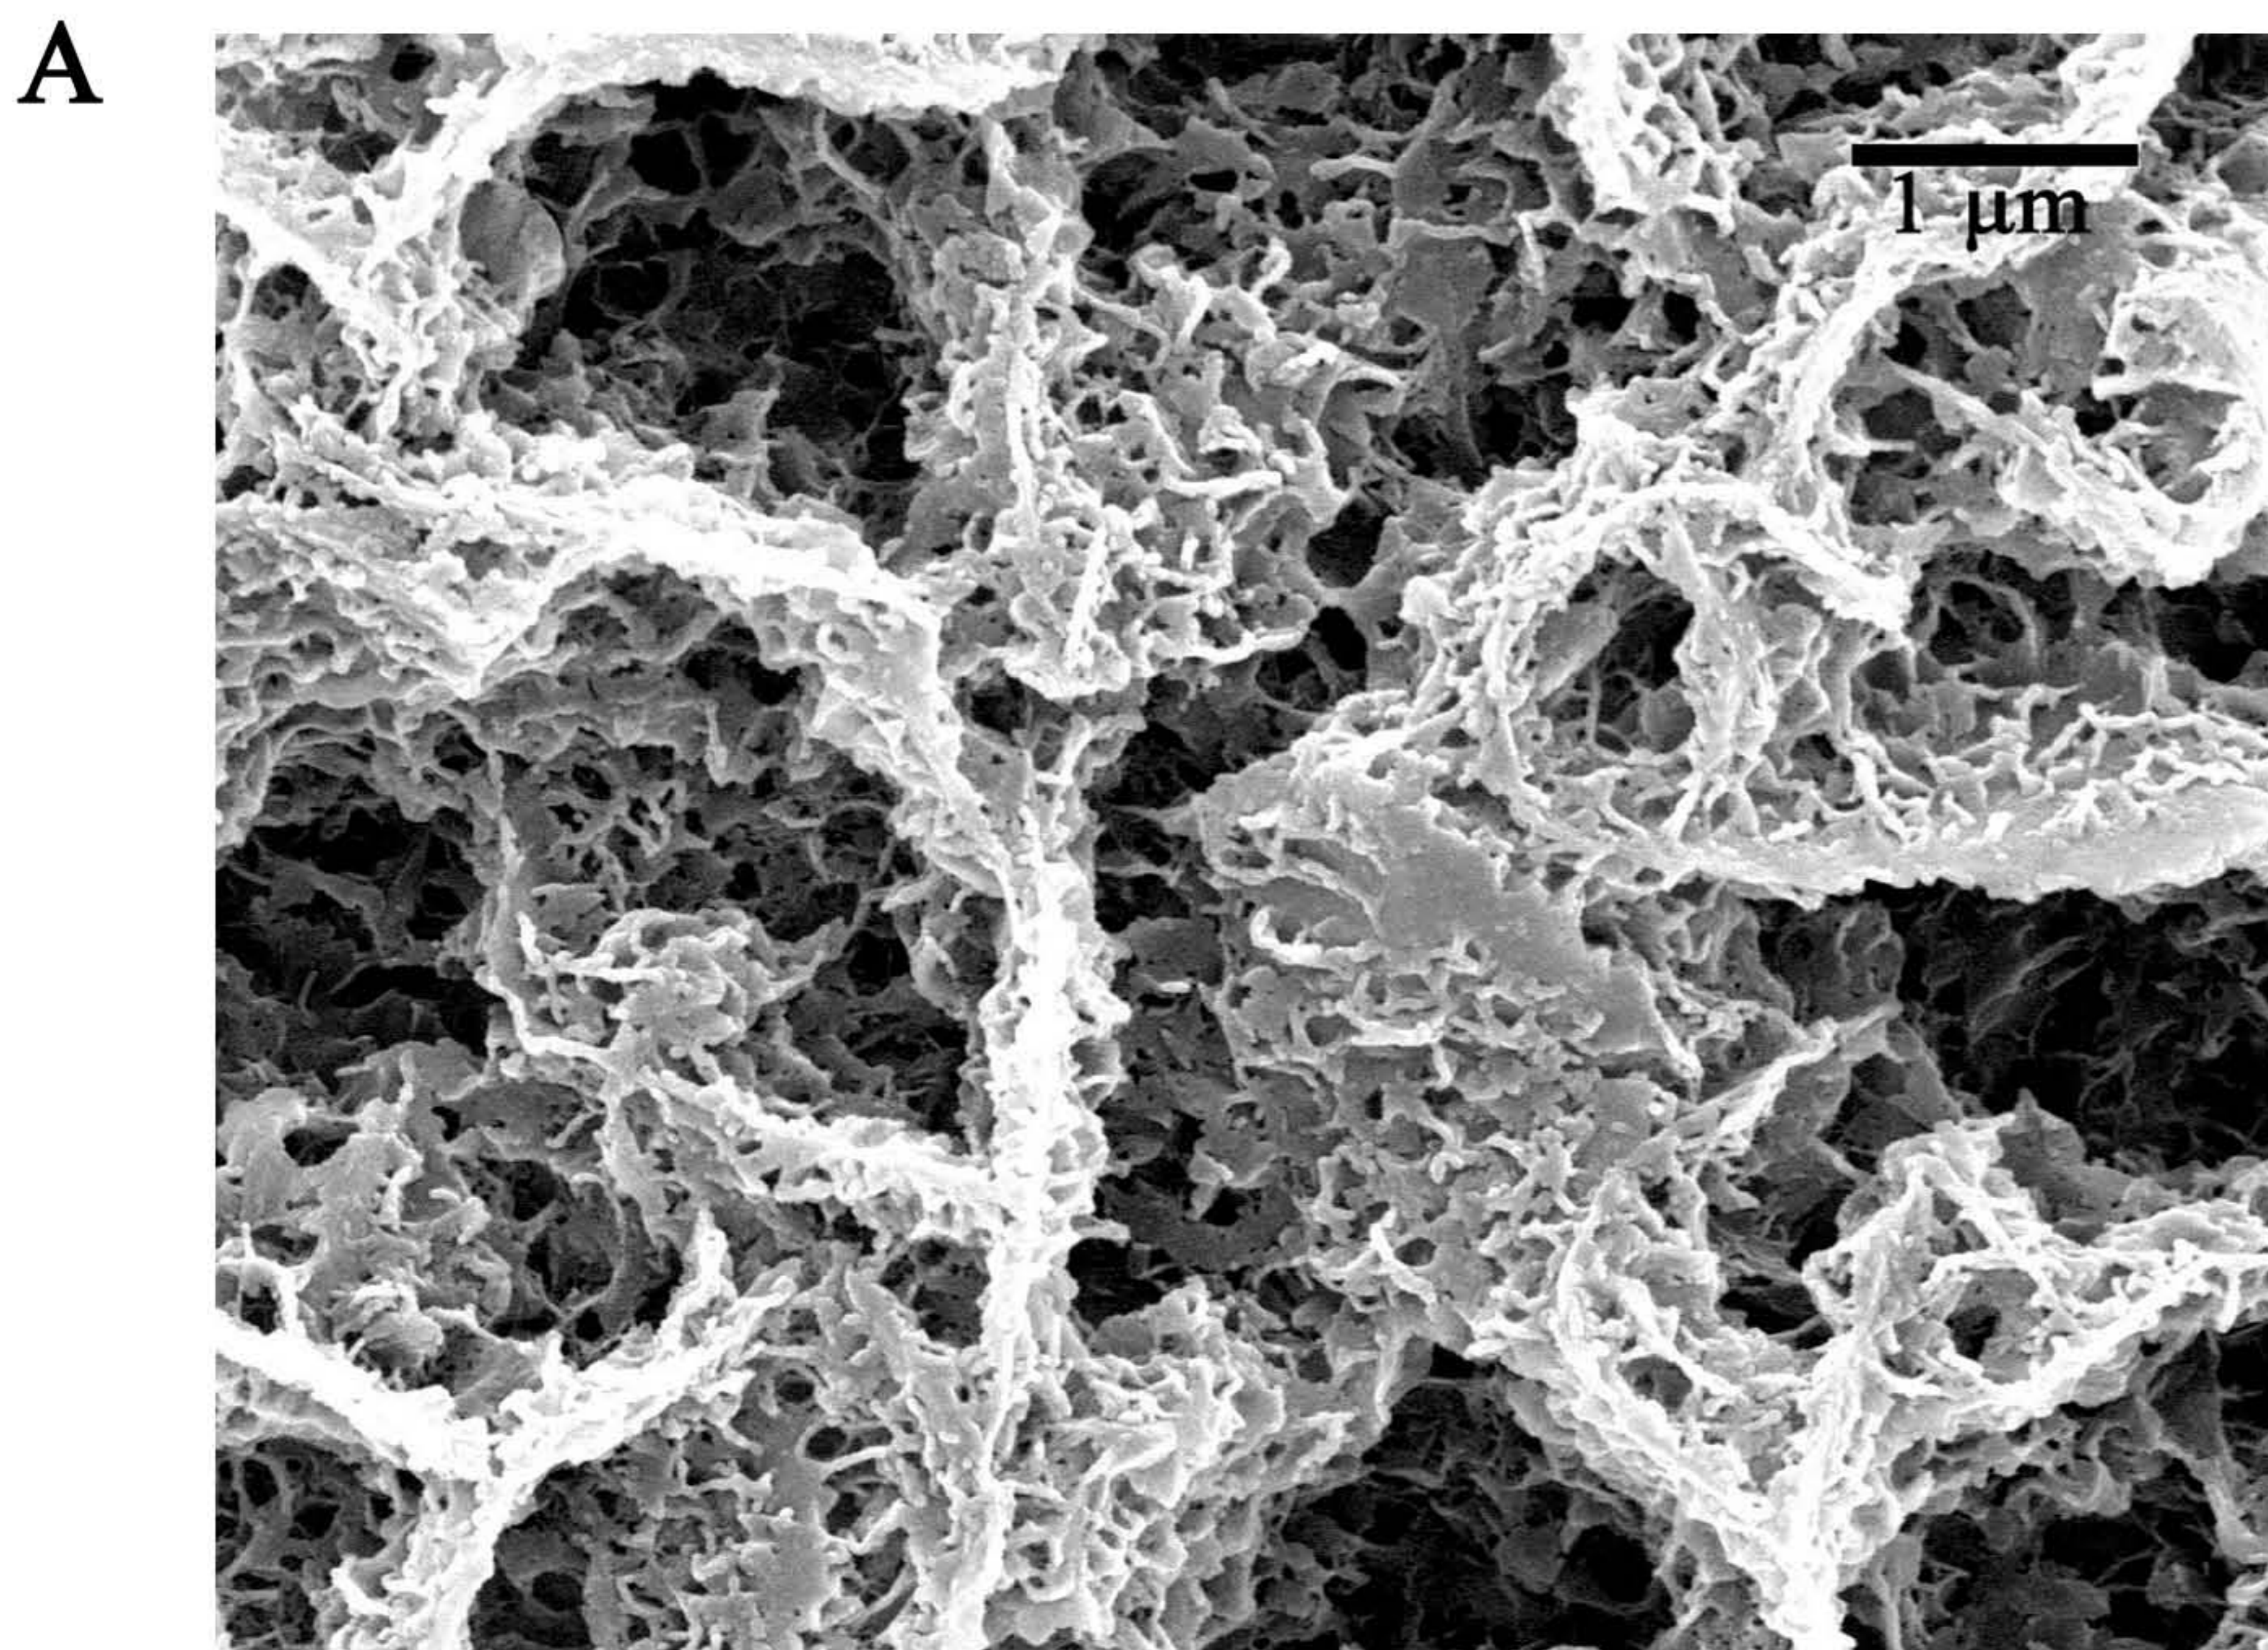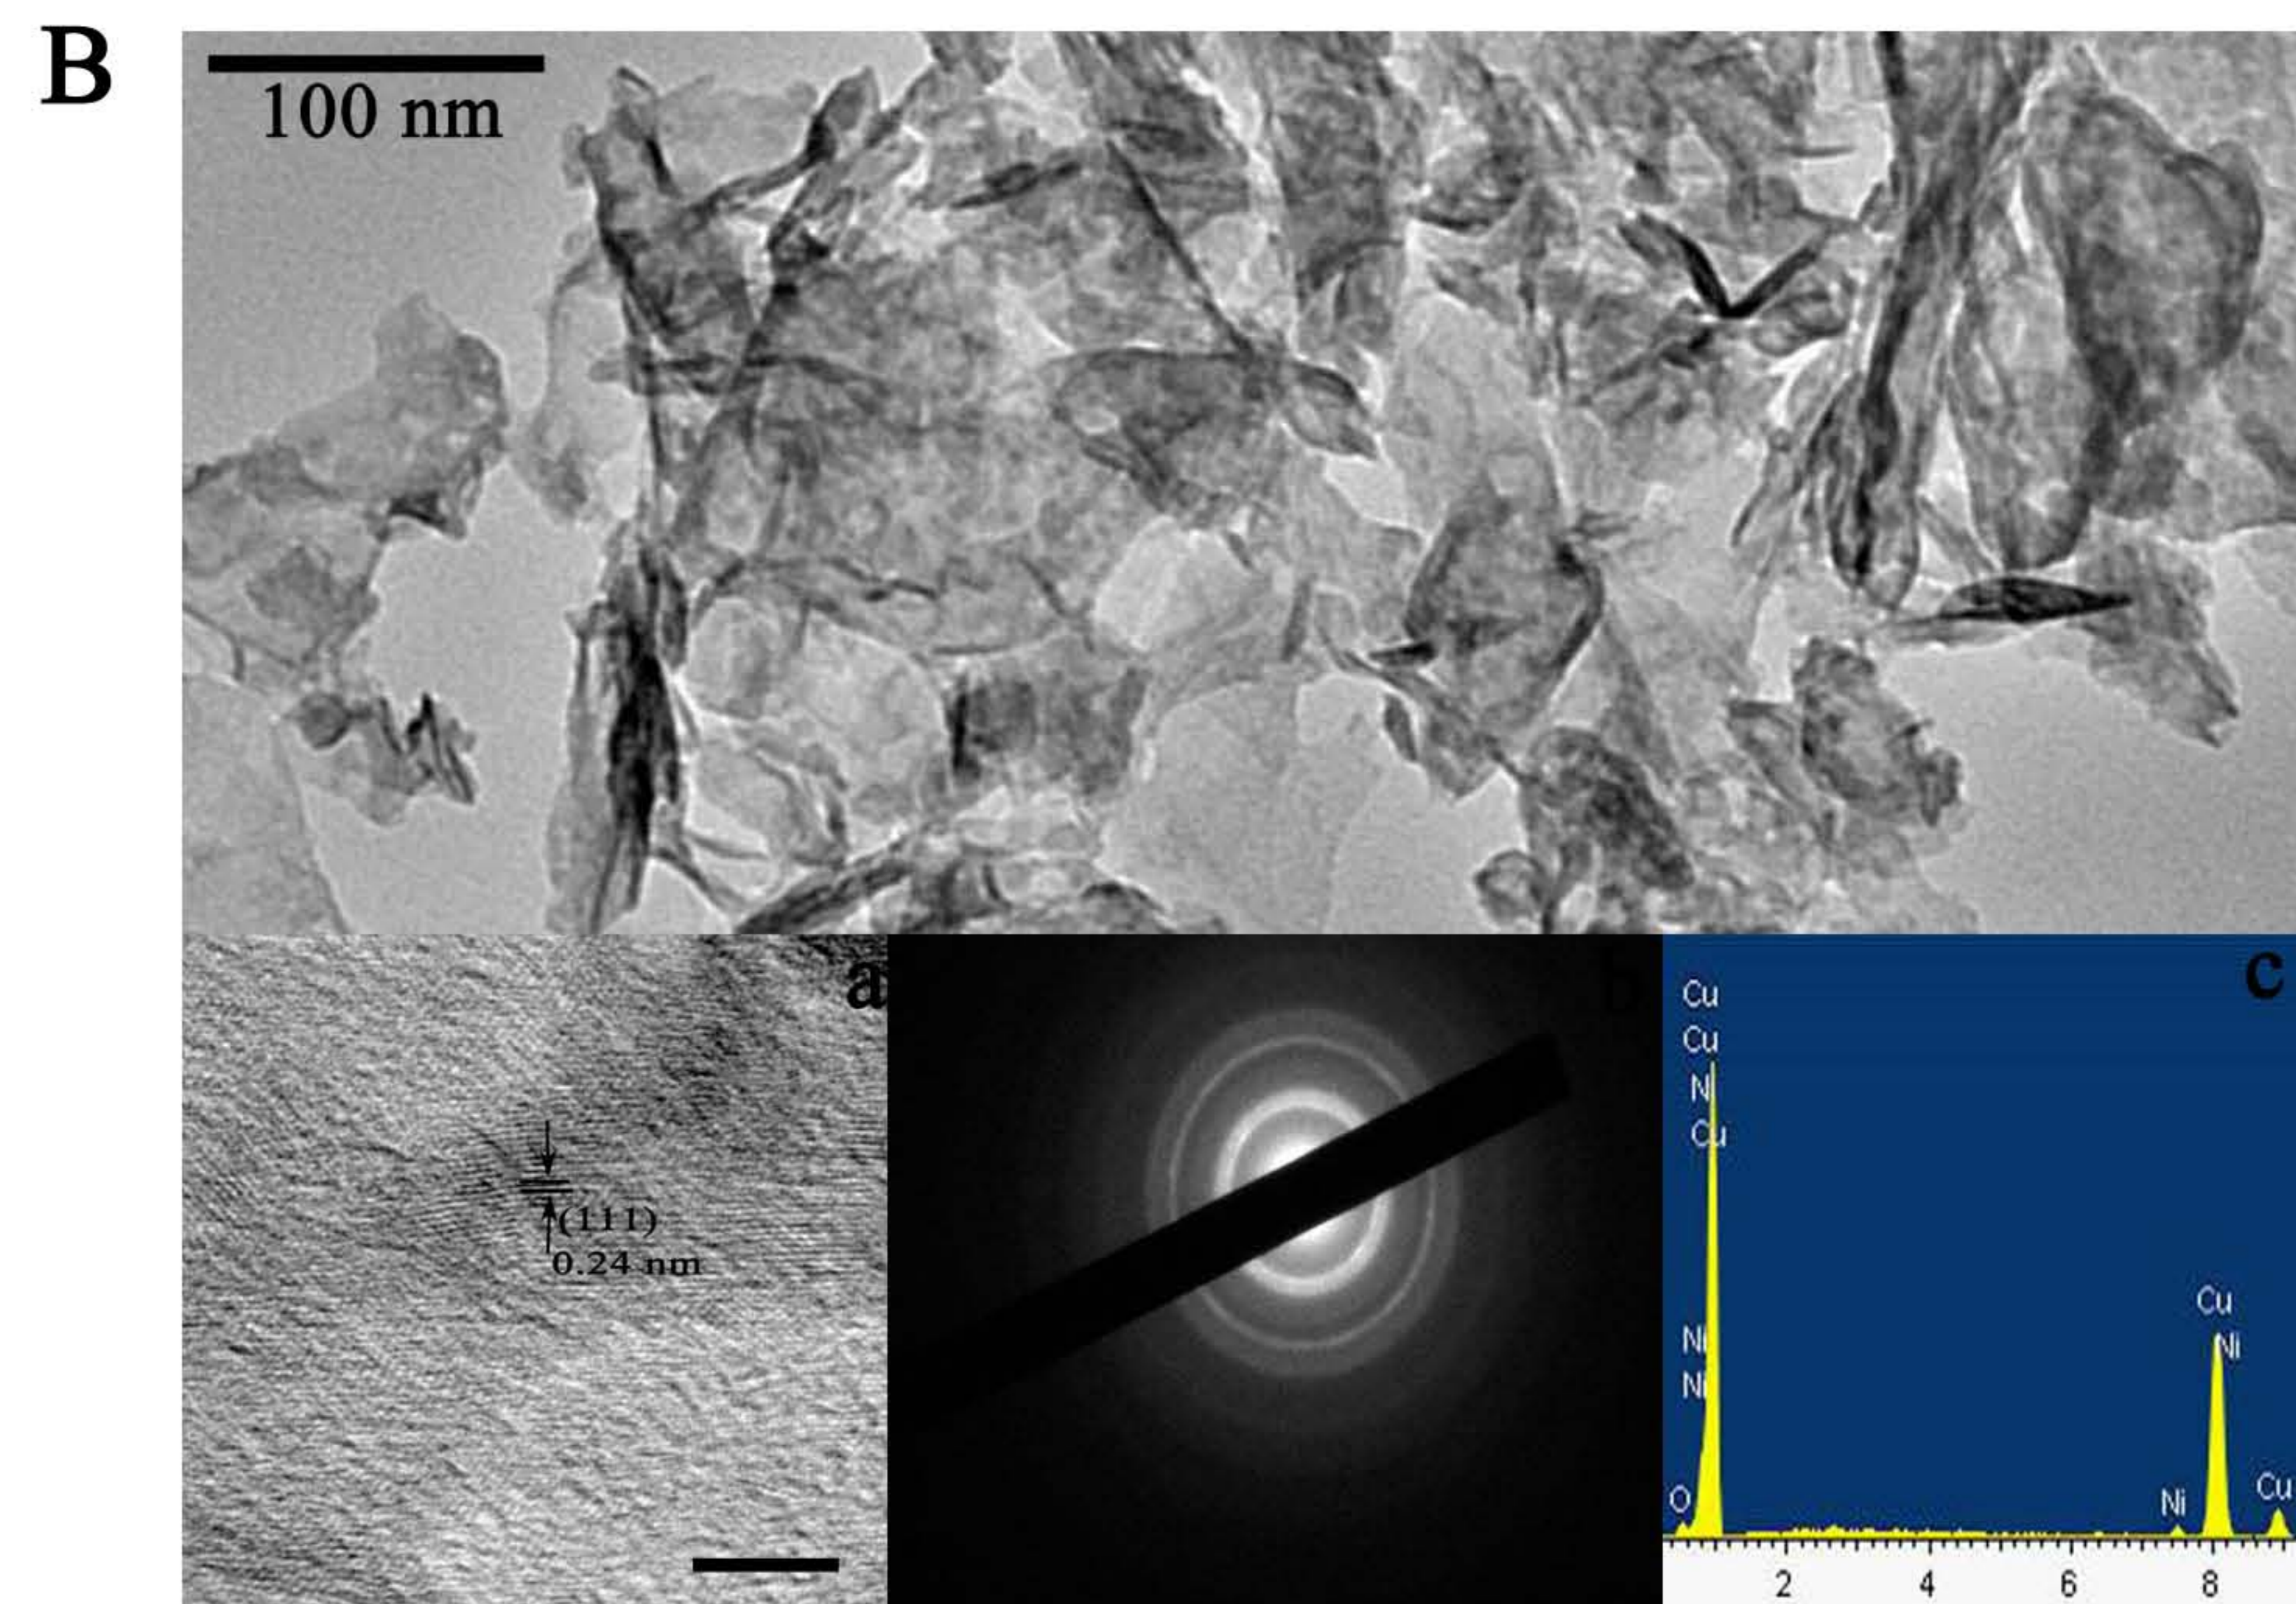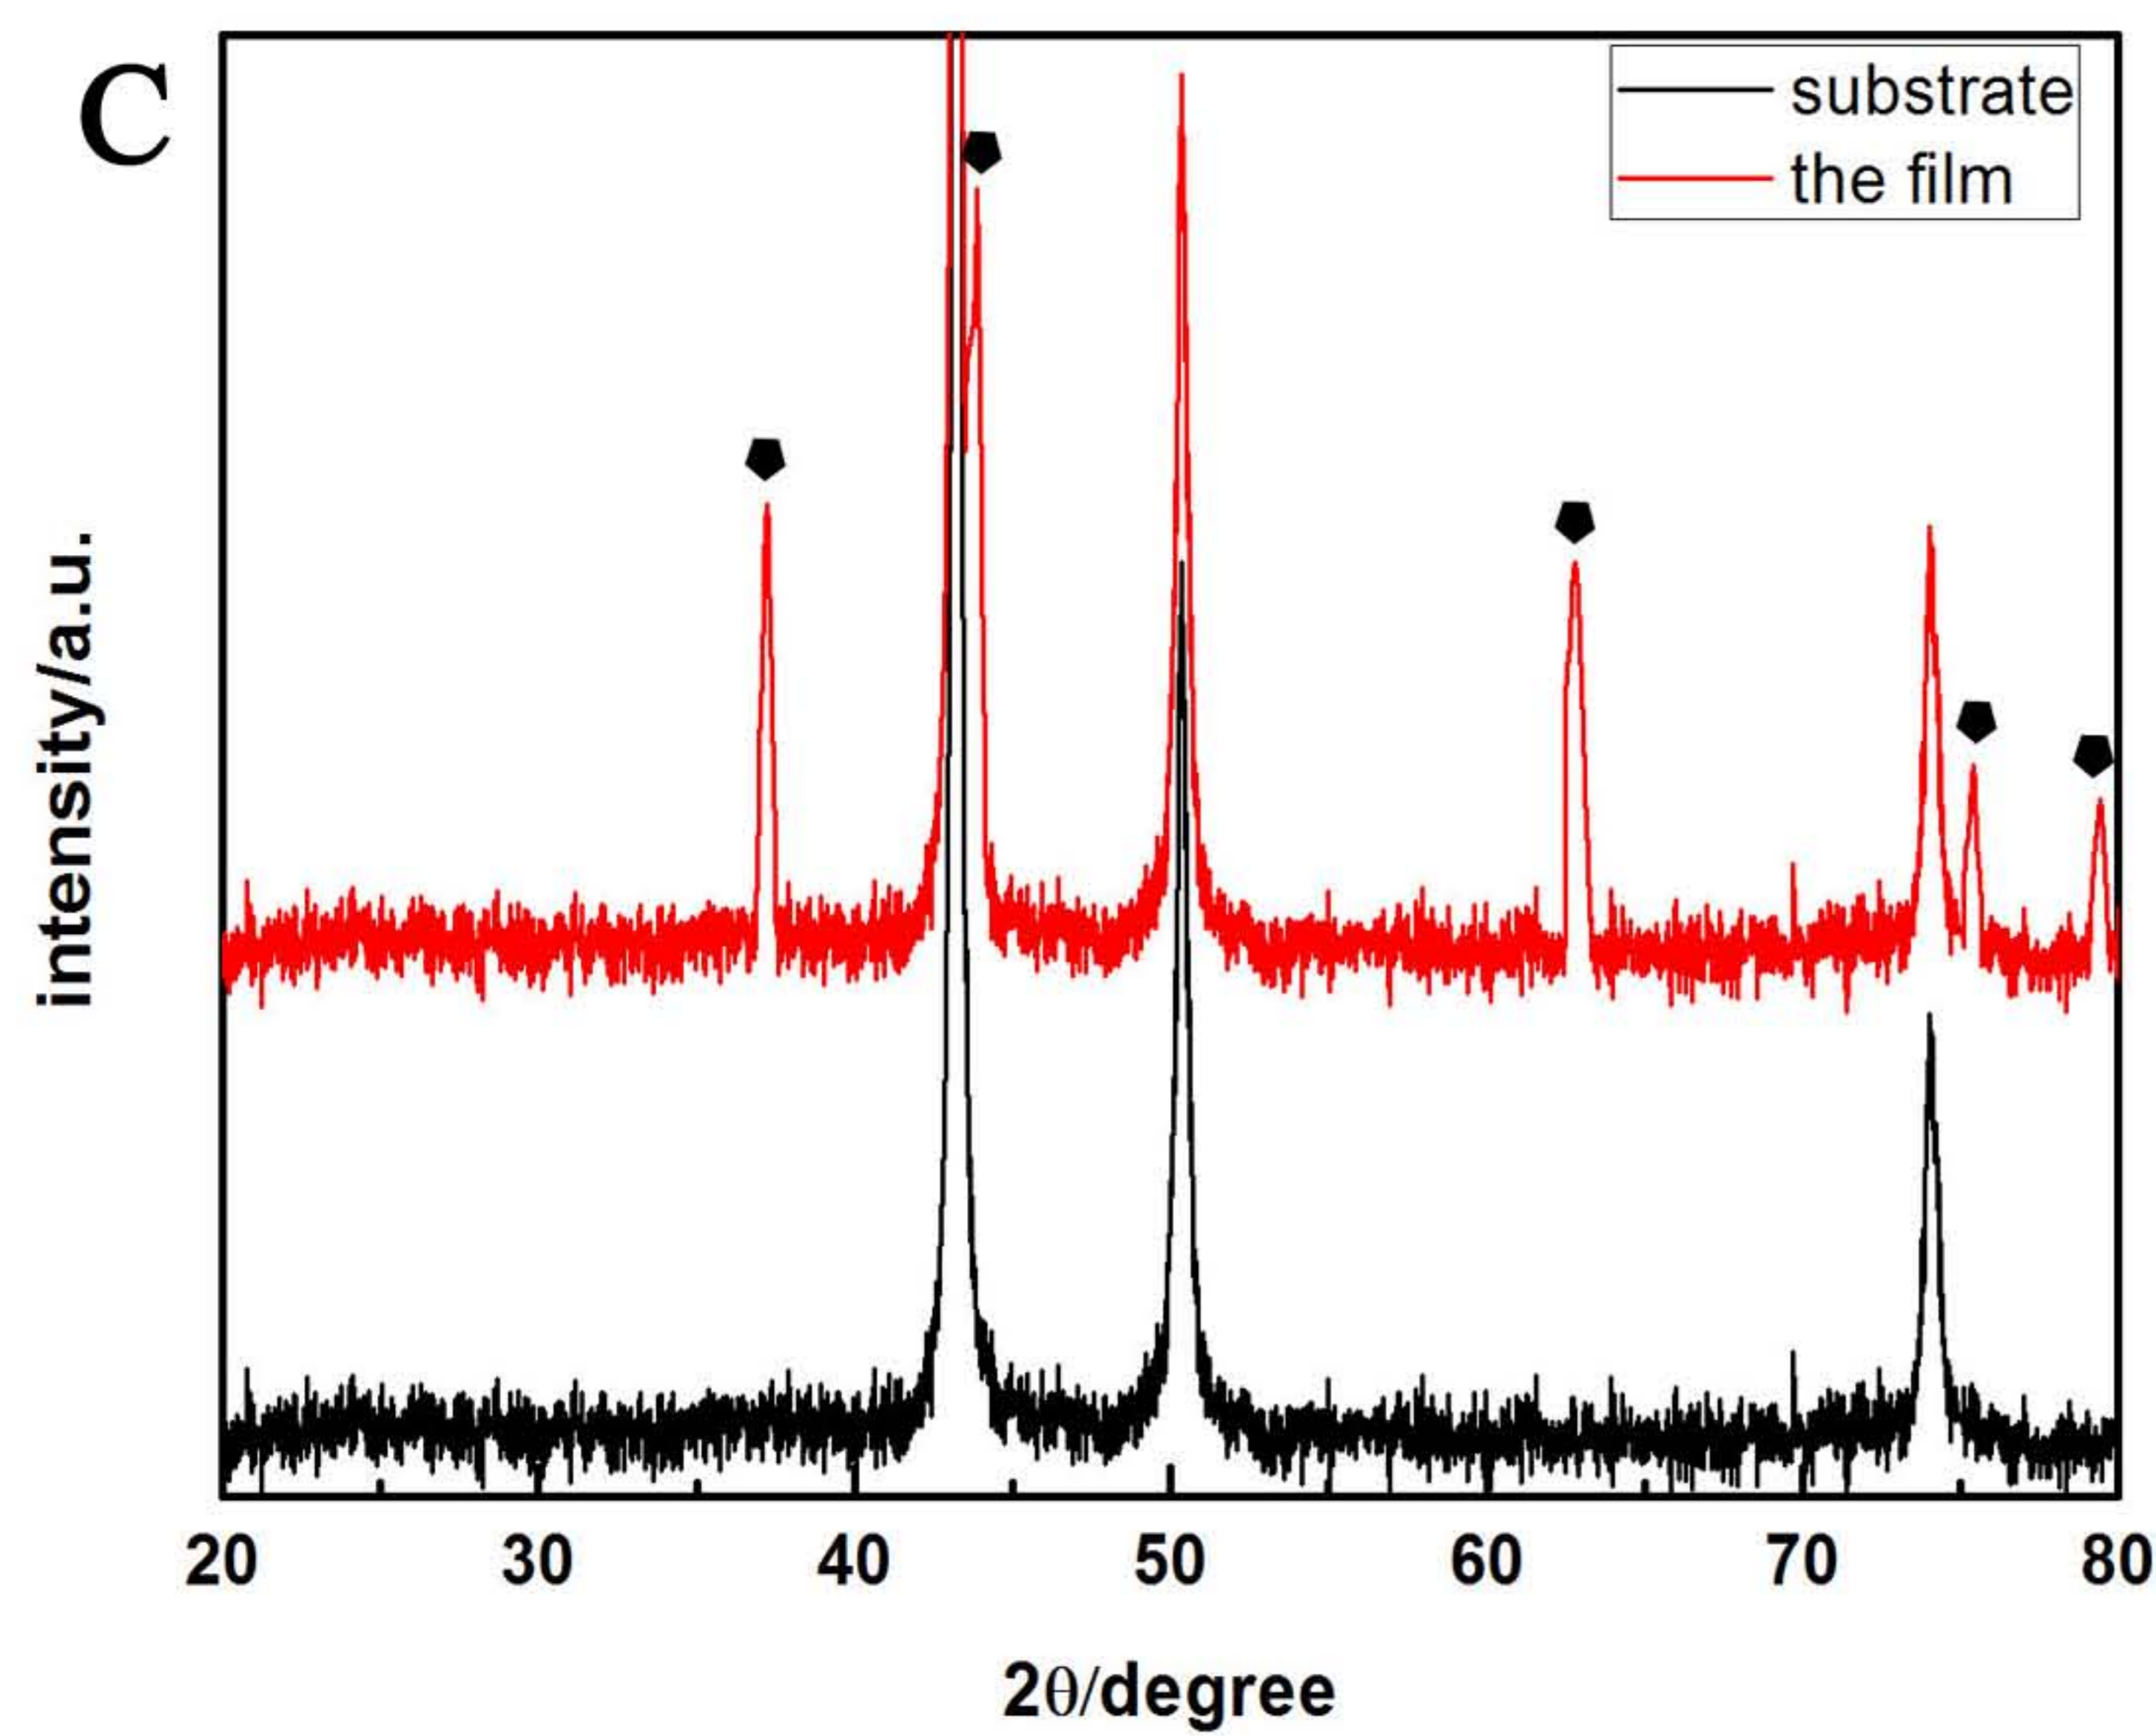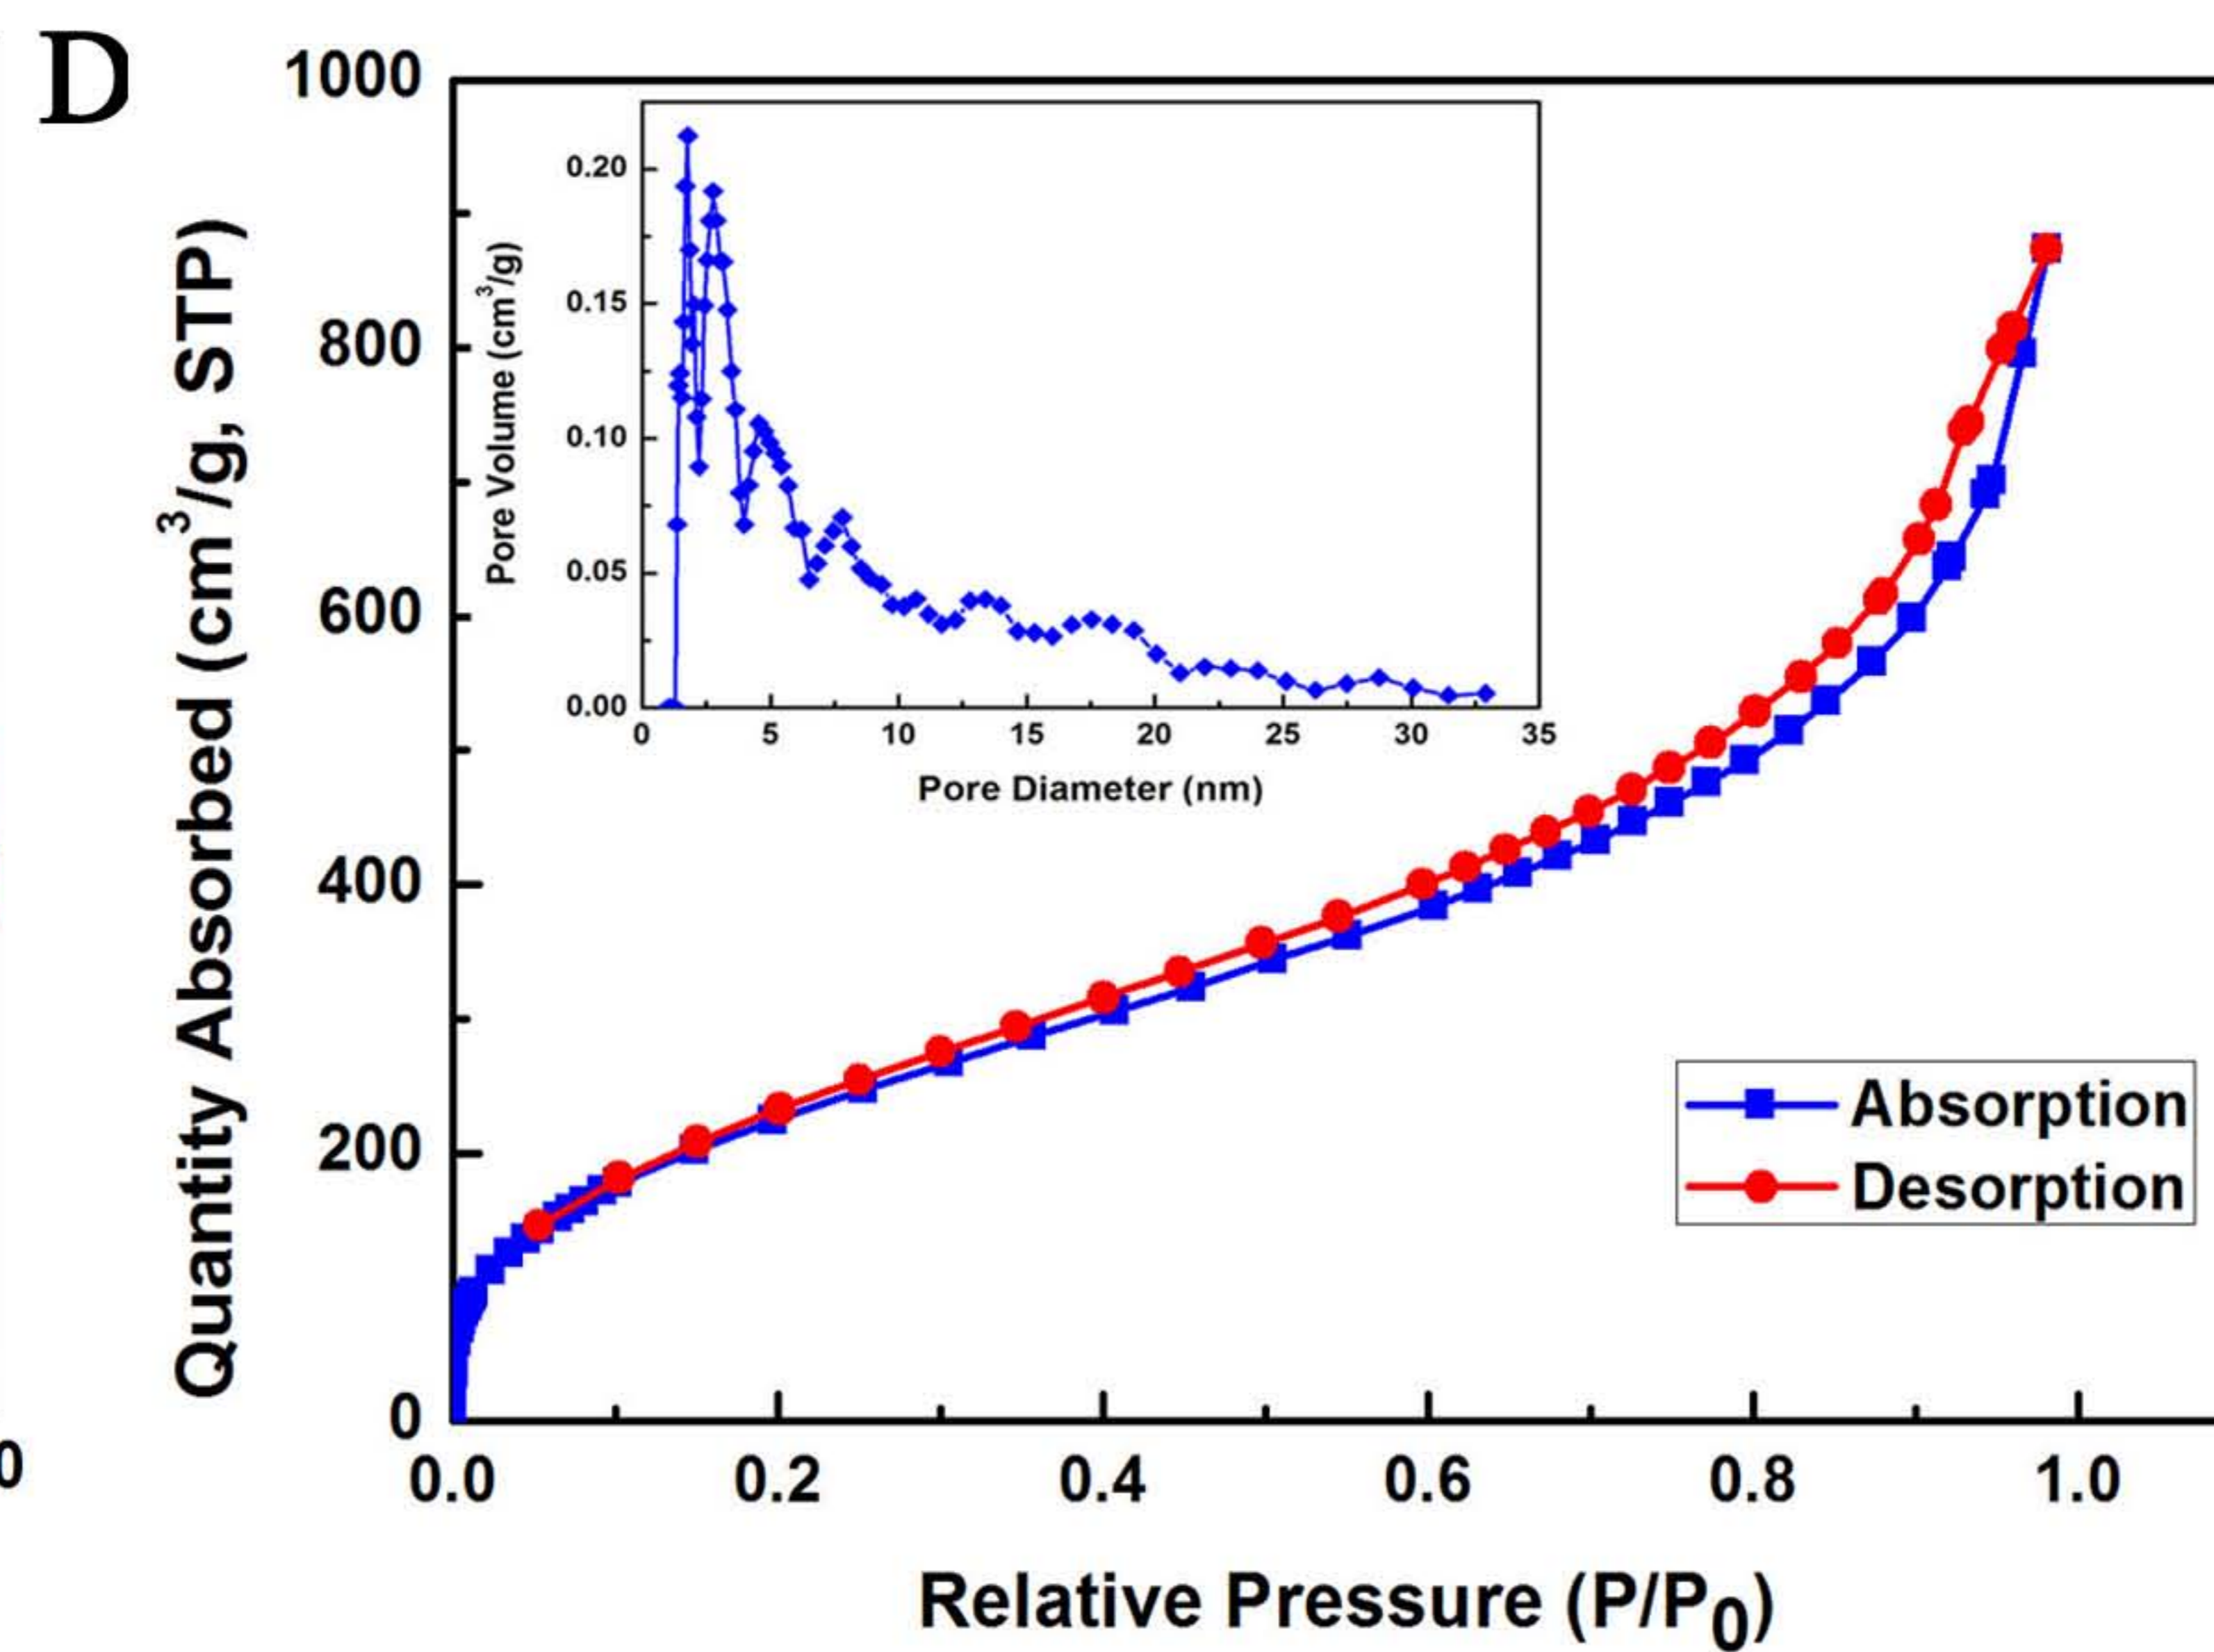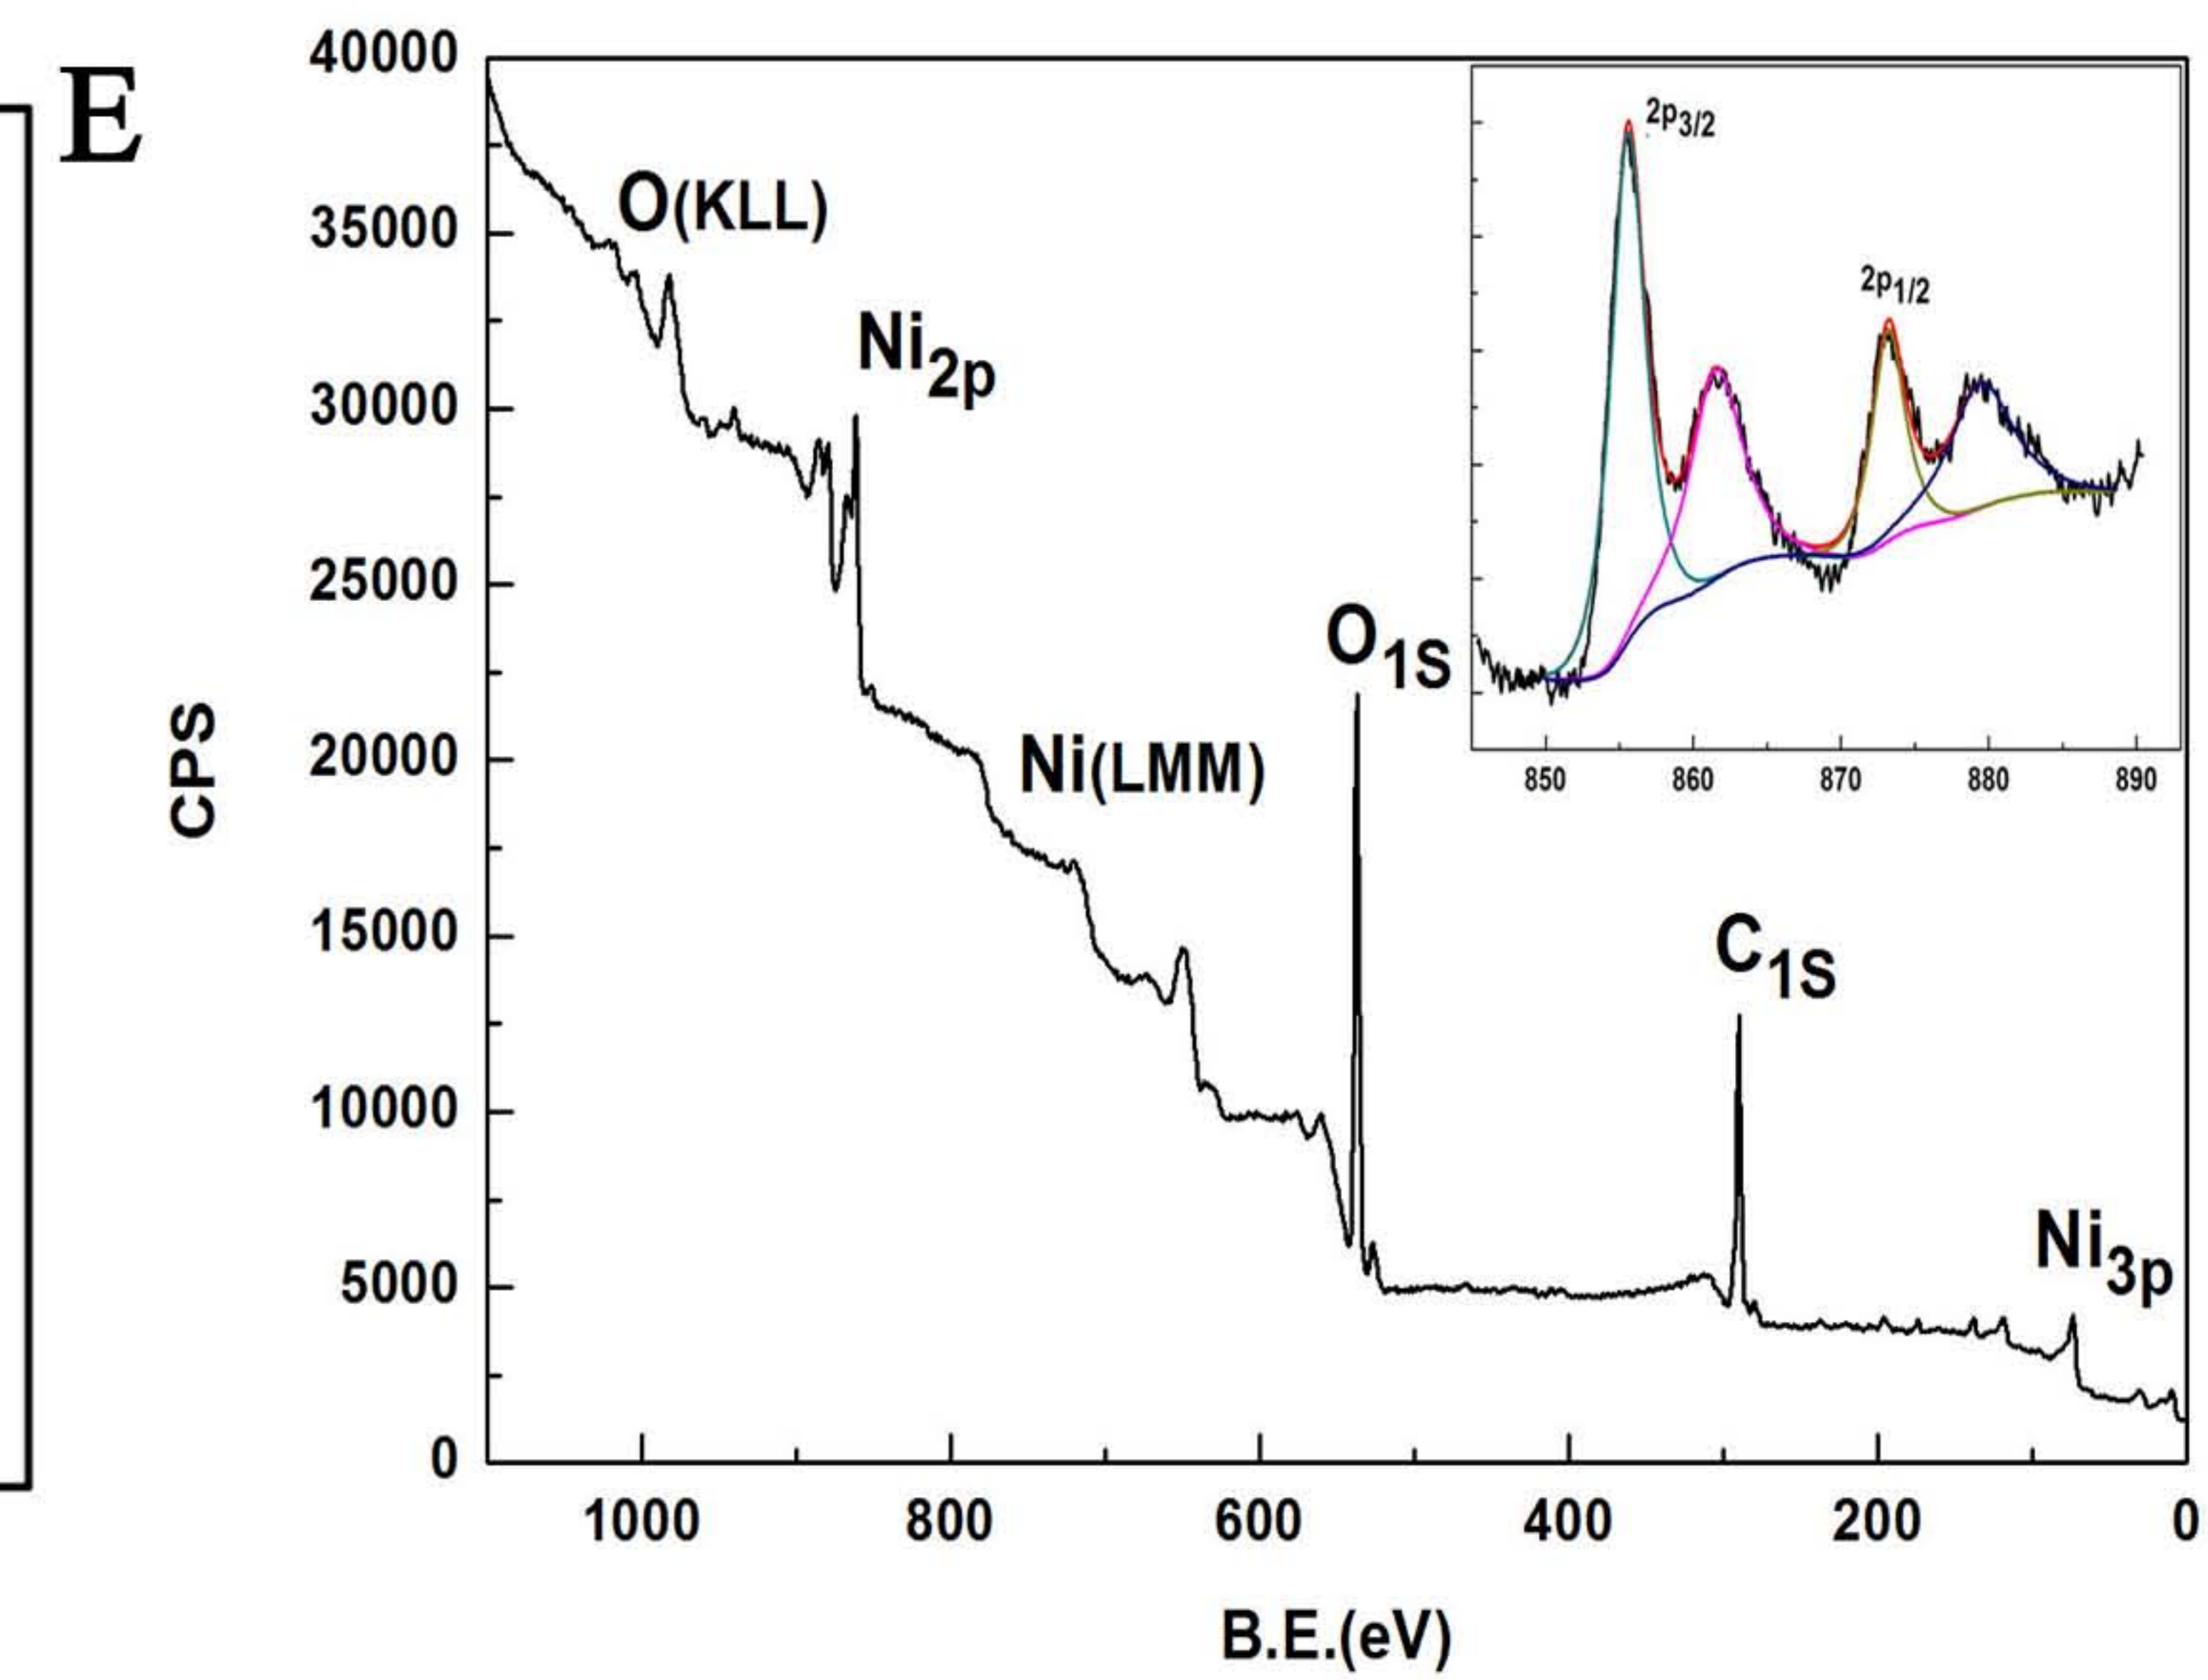

Supplement: c2jm31526b.pdf [file c2jm31526b.pdf]

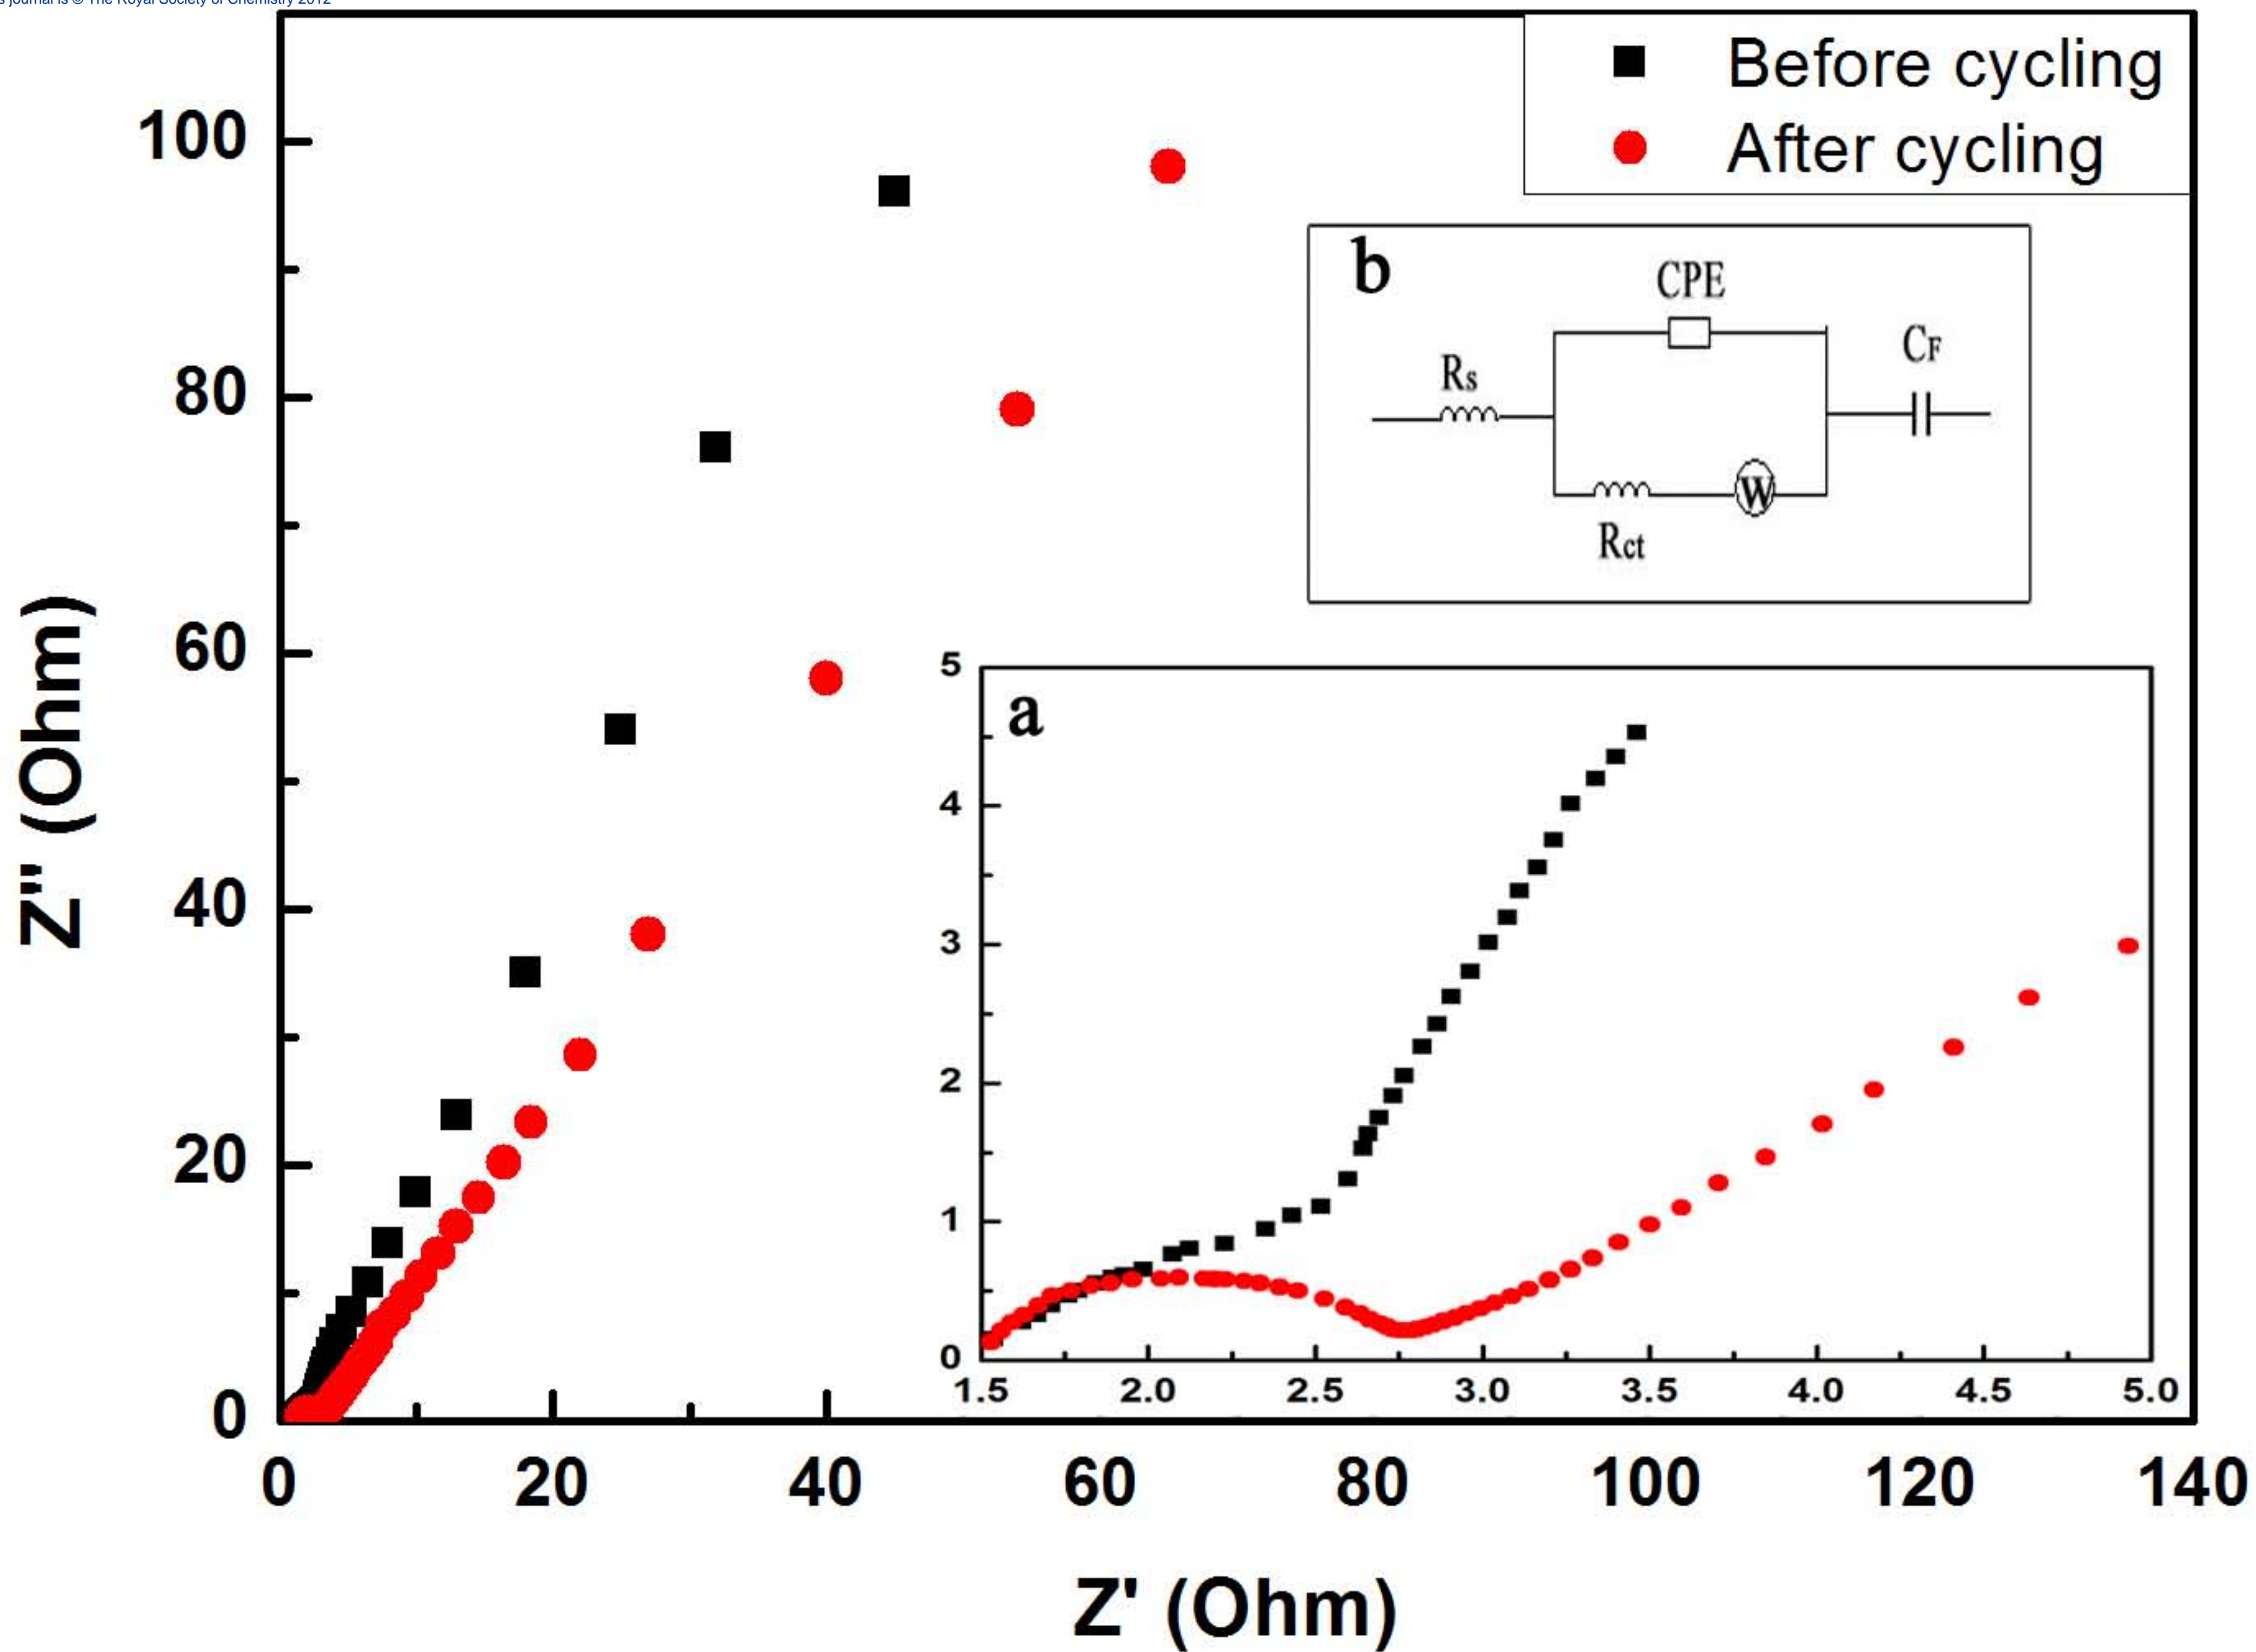

Supplement: c2jm31526b_3.pdf [file c2jm31526b_3.pdf]
